# Supplementary material
Source: Springer Nature journal article supplement (https://www.springermedizin.de/resource/supplementary/12943_2014_1348_MOESM18_ESM.pdf/9552730)

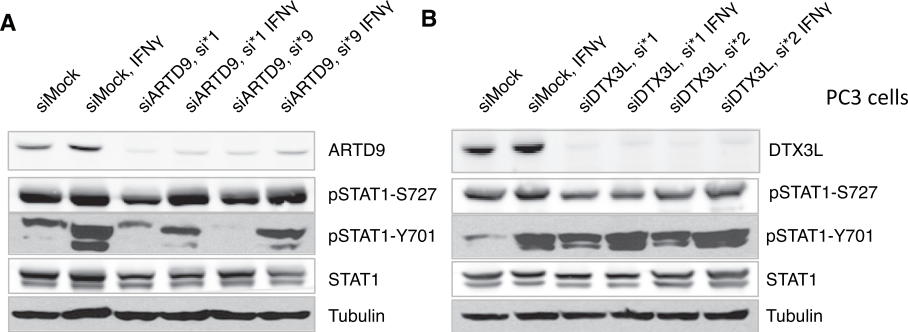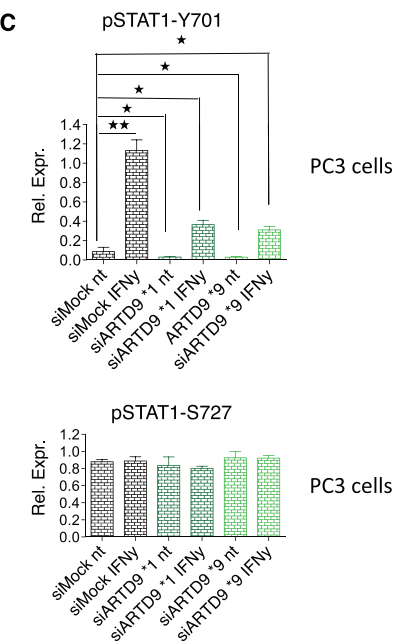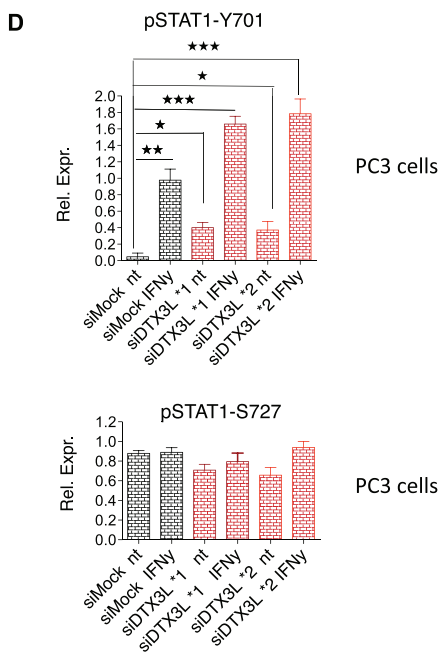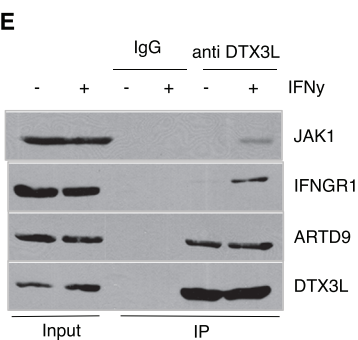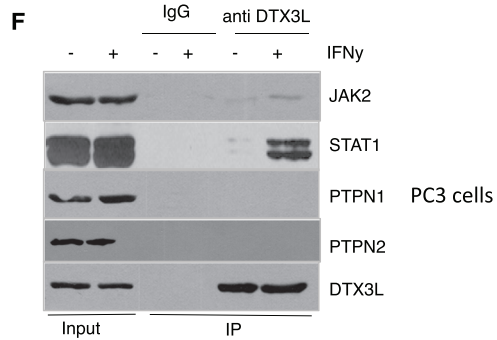

Supplement: MOESM18 [file 9552730]
